# Supplementary material
Source: publisher site journal article supplement (https://www.dovepress.com/article/304298)

**Figure S1** Representative fluorescence staining results showing that PC3 cell lines were transfected with adenovirus vector packed with siRNA-NC or siRNA-MCT4. GFP: Green fluorescent protein


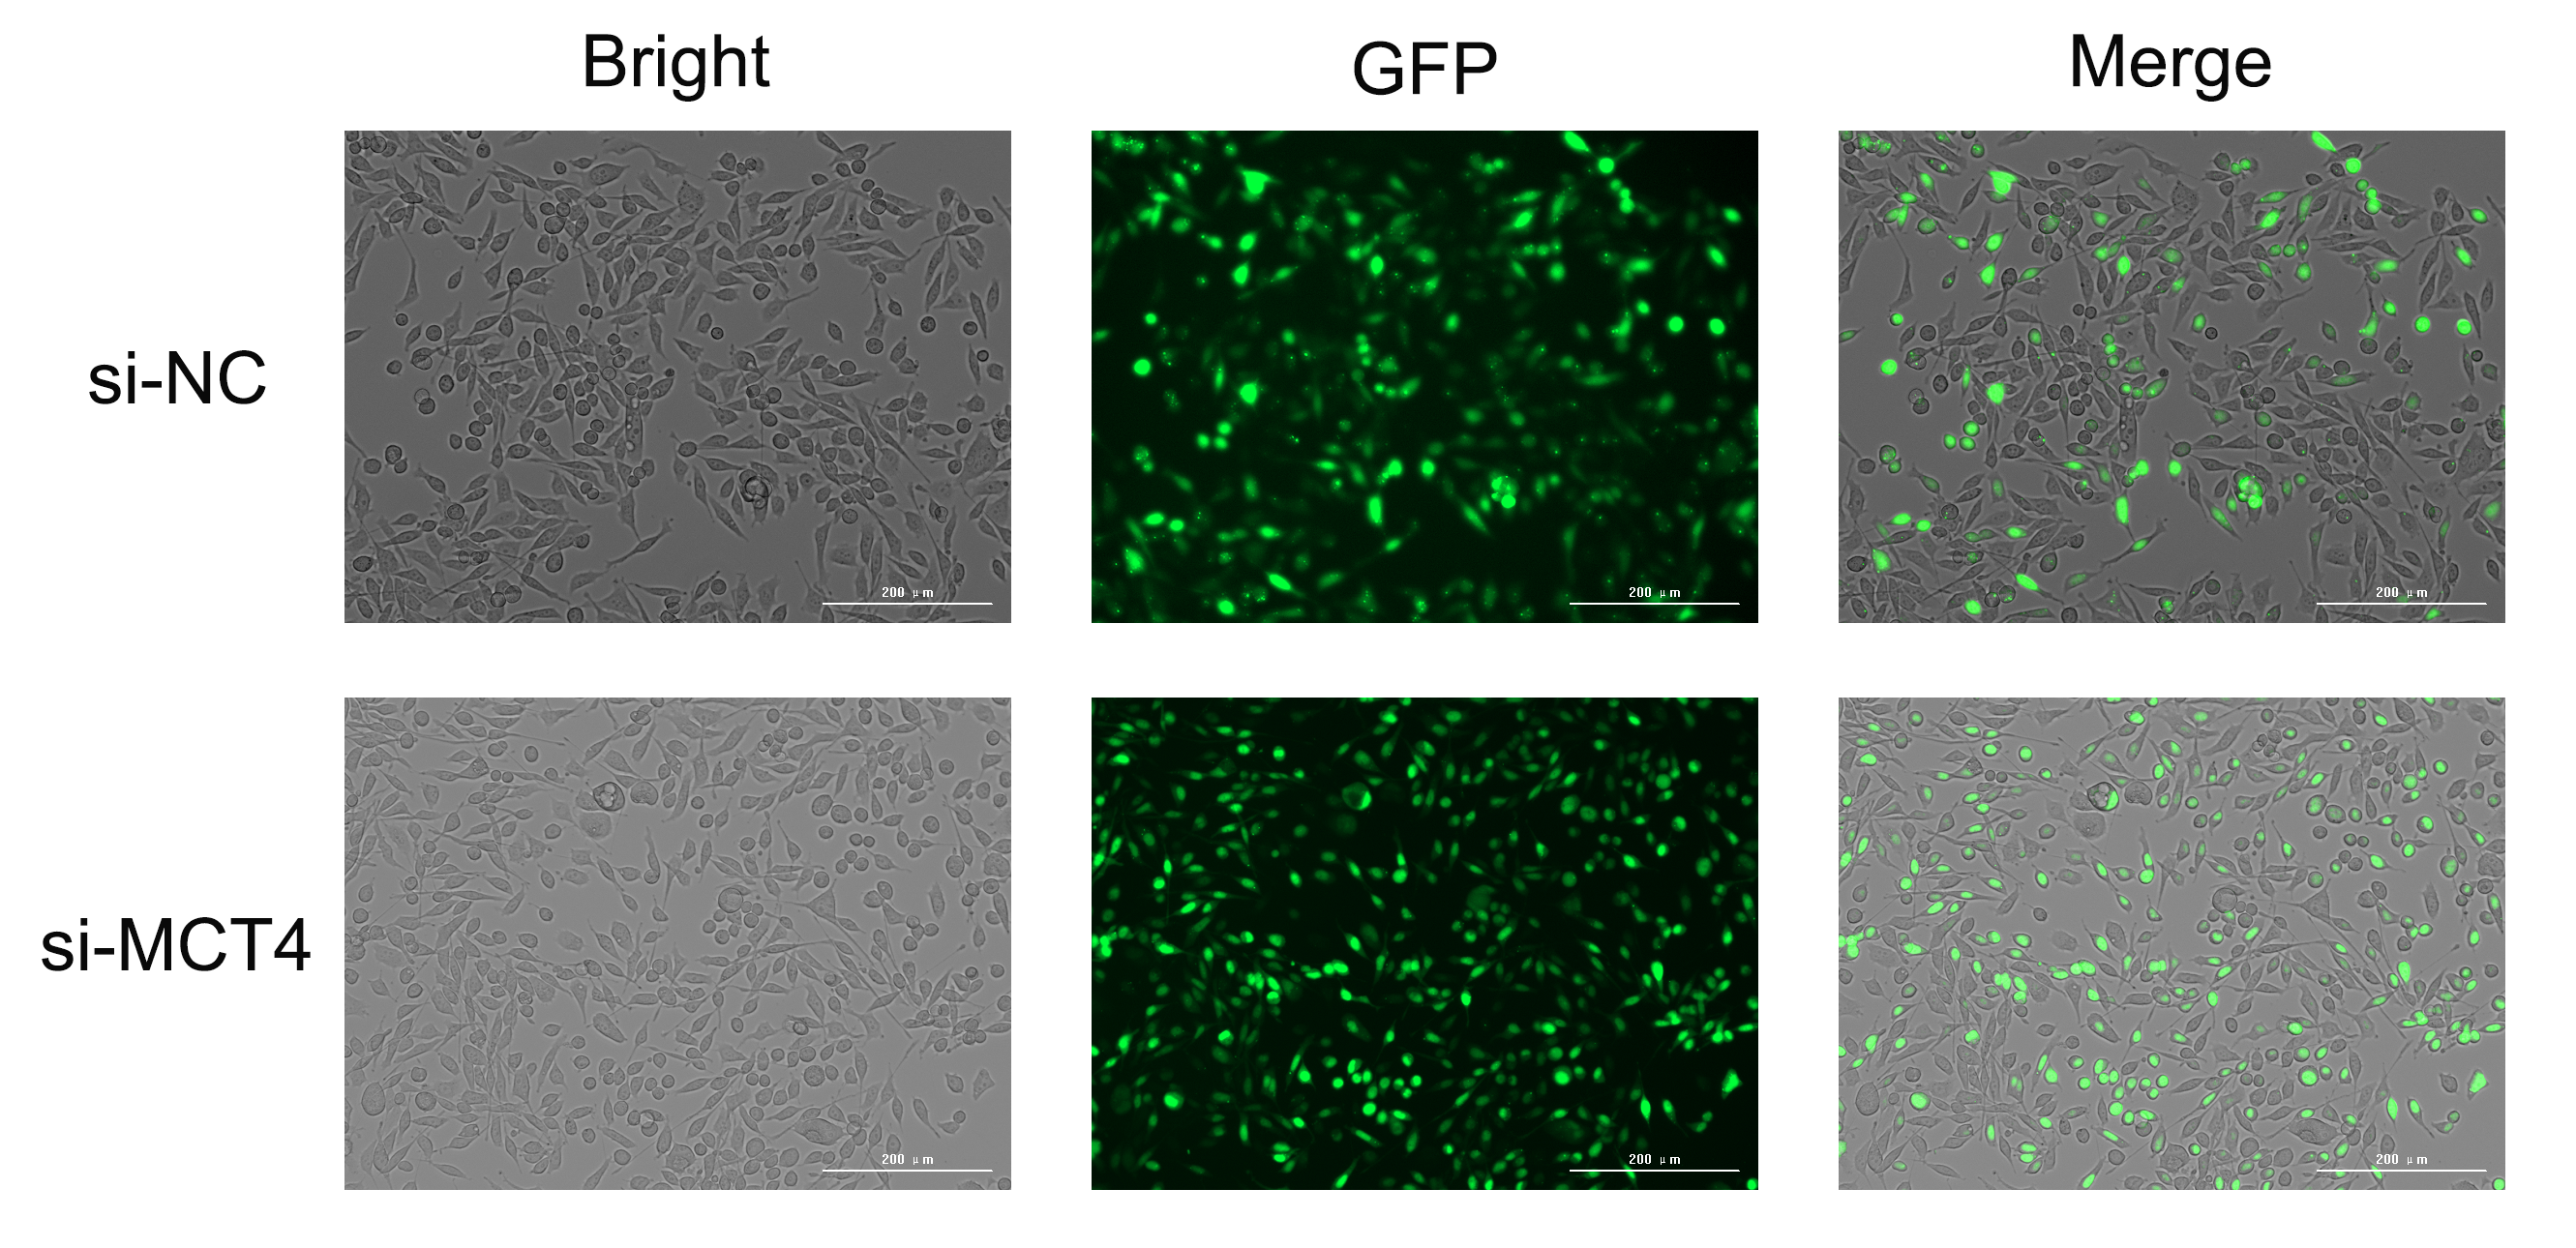


**Figure S2** Co-cultured model: RAW246.7 macrophages were seeded in the lower chambers of the transwell plate with PC3 cells in the upper chambers. (**A**) The pictures of the co-culture model. (**B**) Representative pictures of RAW246.7 macrophages. (**C**) Representative pictures of PC3 cells.


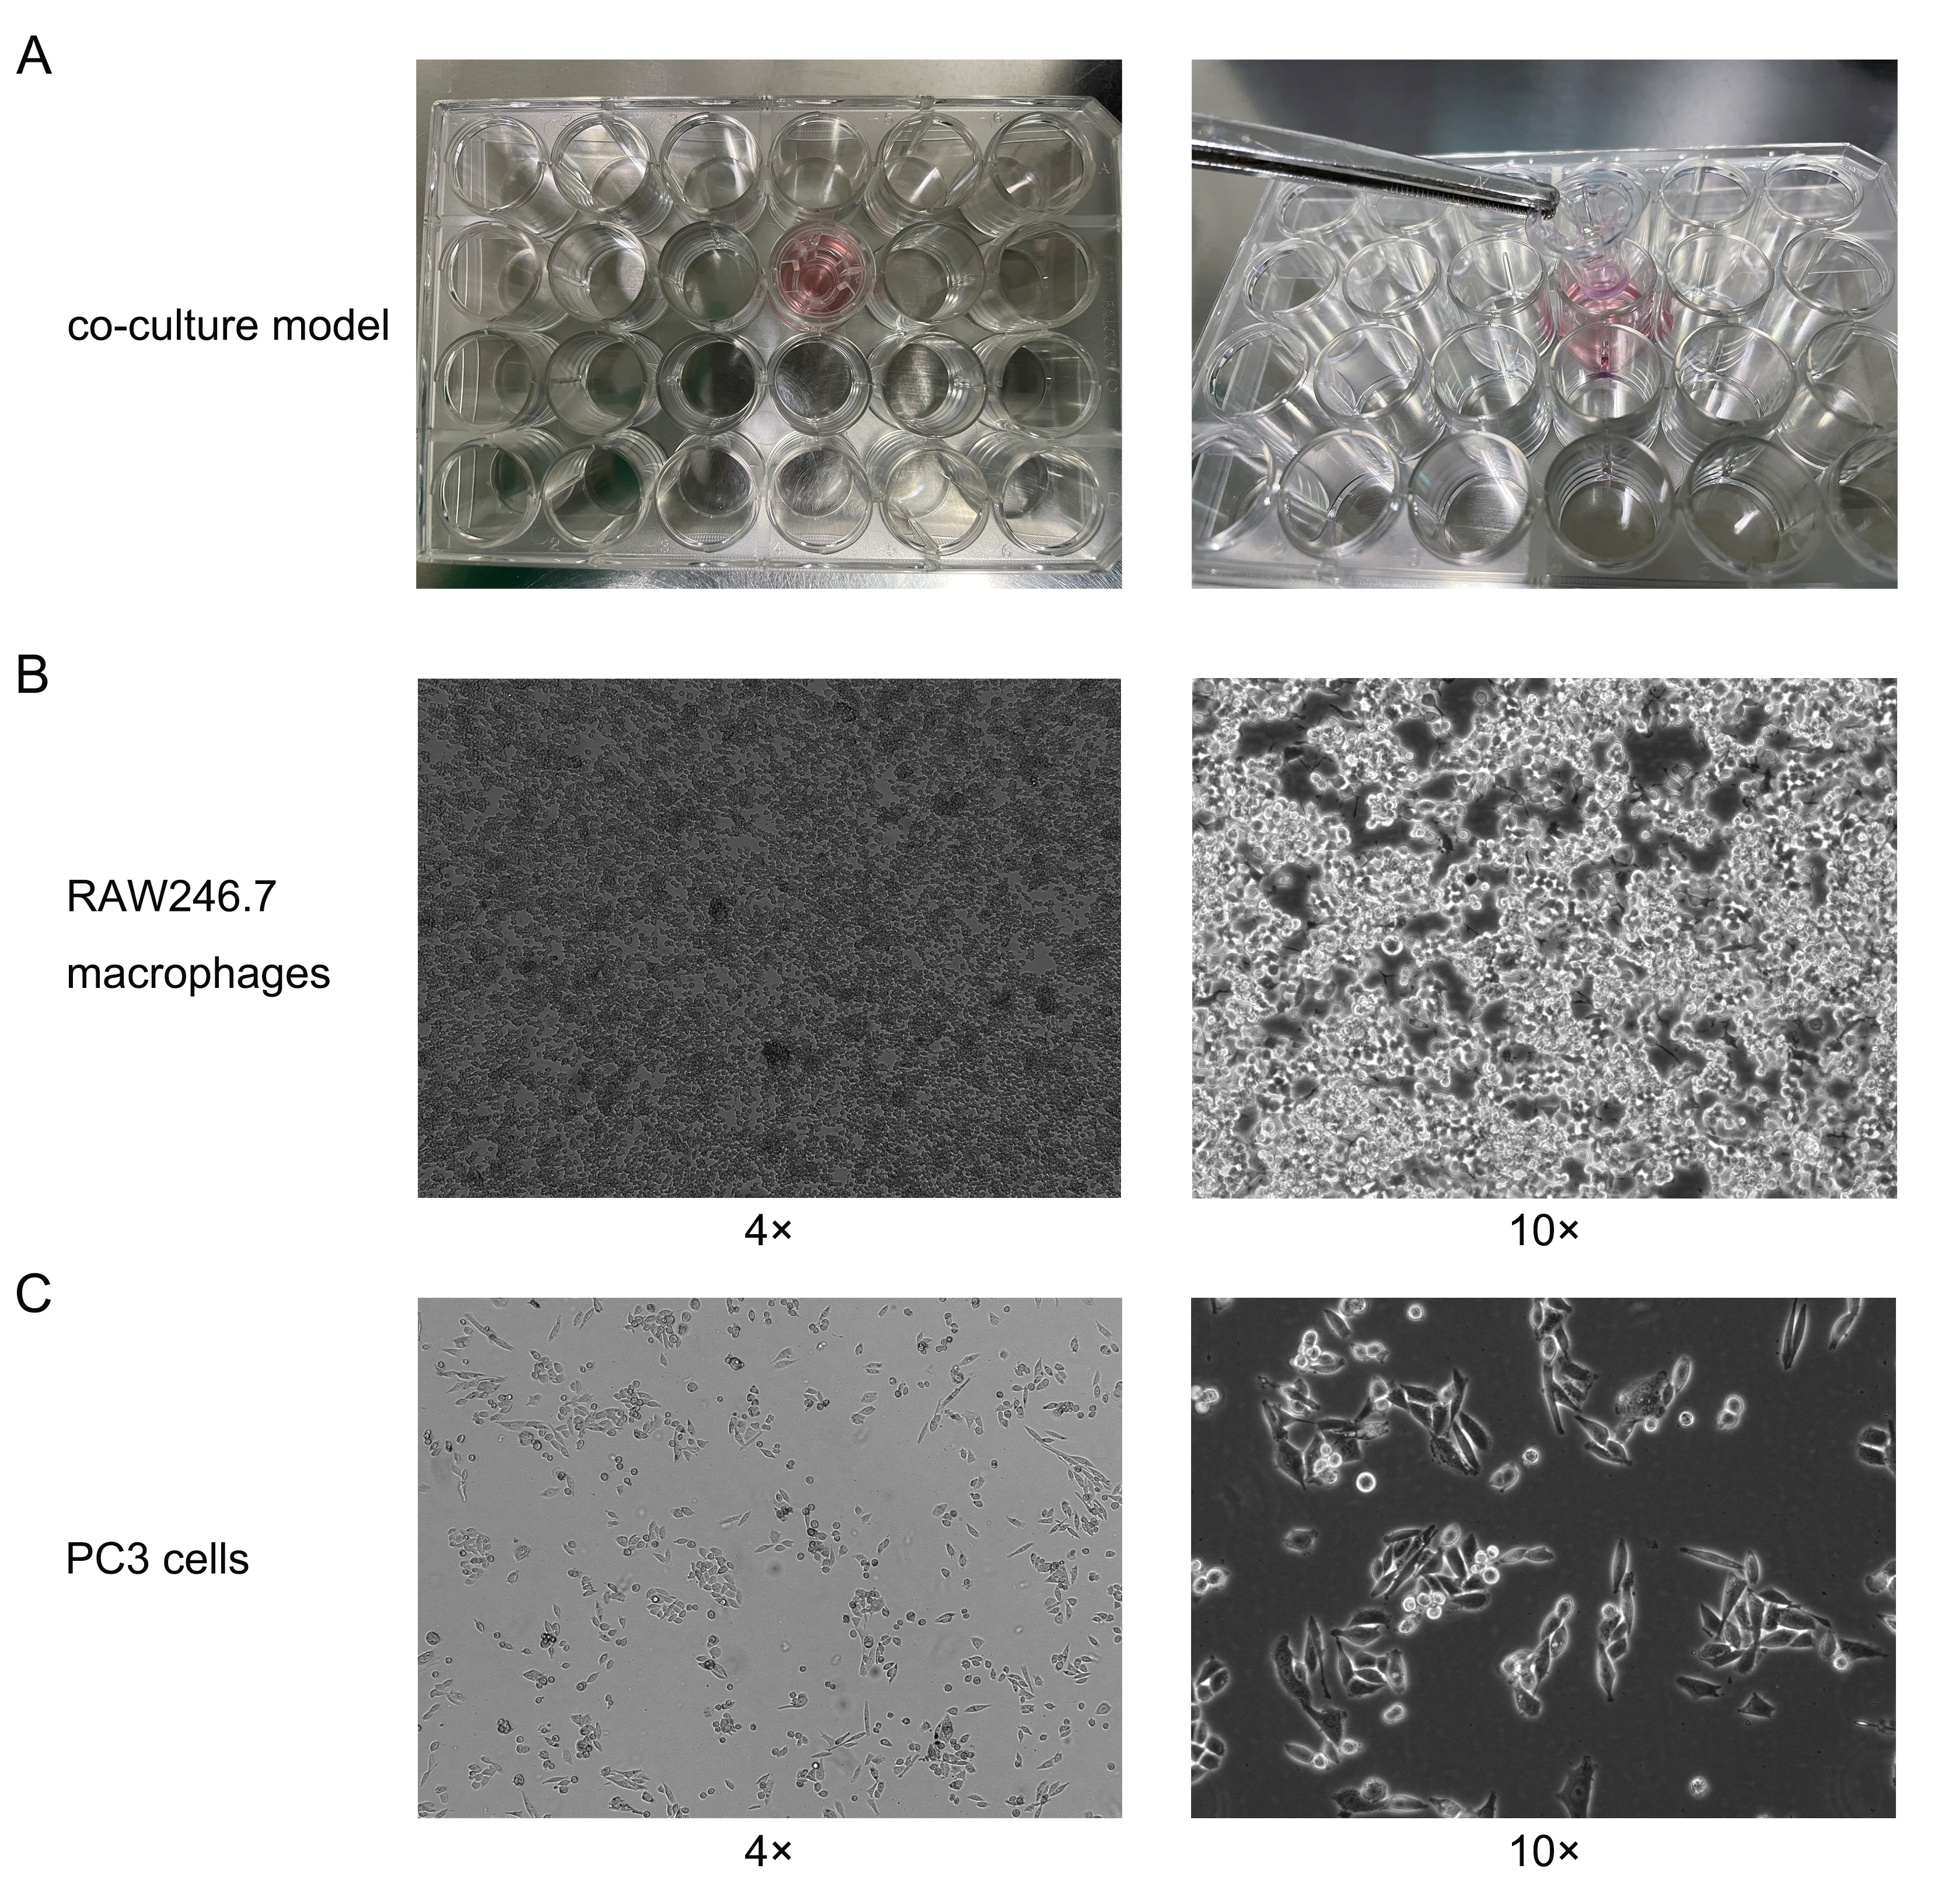

Supplement: Supplementary file 1 [file get_supplementary_file.php]
